# Supplementary material for: Unsupervised Clustering of Heartbeat Dynamics Allows for Real Time and Personalized Improvement in Cardiovascular Fitness
Source: MDPI journal article supplement (doi:10.3390/s22113974), 2022-05-24
Supplement: s1 [file s1]

### Supplementary Materials Figure S1

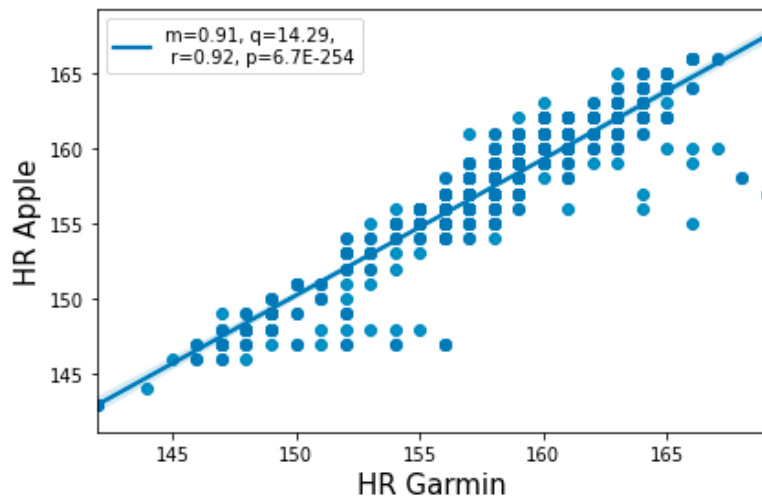

**Figure S1.** Comparison analysis between Heart Rate acquired by Apple Watch and Heart Rate acquired by Garmin. Linear regression highlights a Pearson correlation coefficient  $R = 0.92$  and  $p$  value  $\ll 0.0001$  so we can say that the two signals are highly correlated.

### Supplementary Materials Figure S2

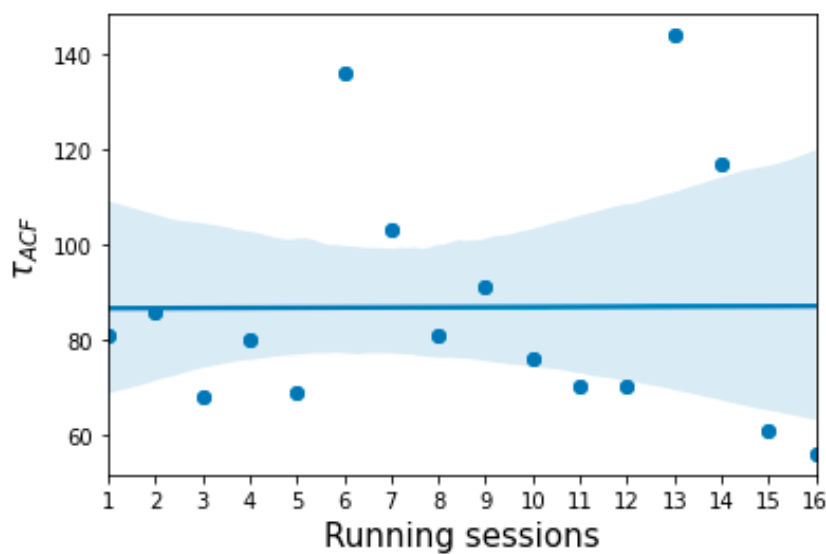

**Figure S2.** ACF time decay ( $\tau_{ACF}$ ) values in sixteen different running sessions acquired by Garmin.  $\tau_{ACF}$  values have been obtained by calculating the intersection values of the ACF with confidence intervals. An important result is the independence of the ACF time decay from training level. The plot in Figure S2 does not show any trend meaning that  $\tau_{ACF}$  is not correlated with physical fitness.

### Supplementary Materials Figure S3

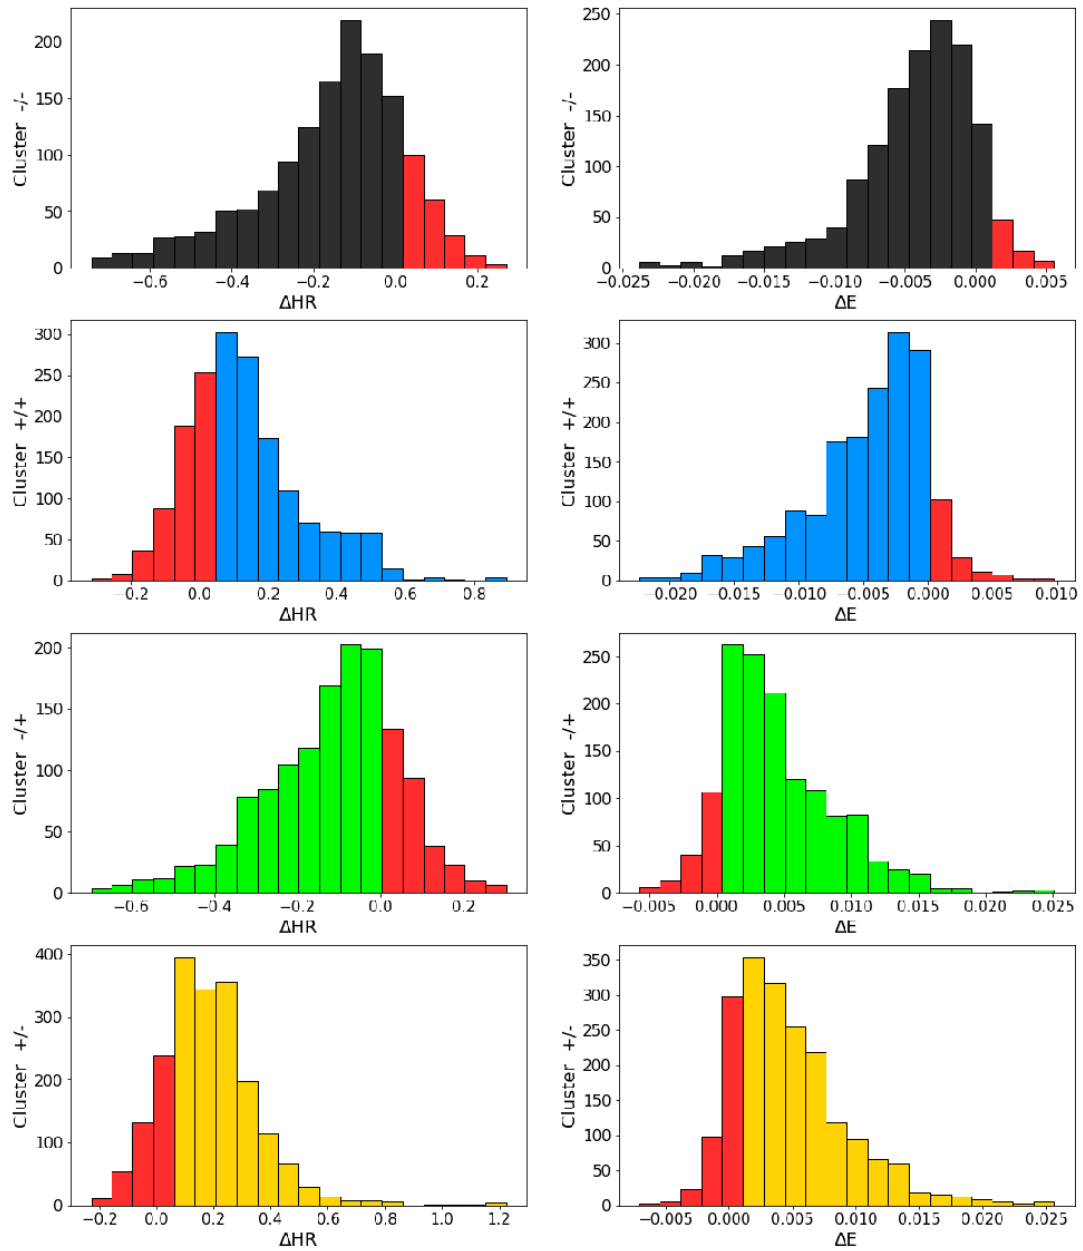

**Figure S3.** Slopes Distributions obtained from the linear regression analysis relative to the four clusters and to the two clustering features  $\Delta E$  and  $\Delta HR$  are reported. The red bars indicate the slope values whose sign do not correspond to the sign of the variations of the clustering analysis, ranging 8% and 23% of the points. The colors of the bar plots are equal to the color used to indicate the respective clusters (black for -/- cluster, blue for +/- cluster, green for +/- cluster and yellow for +/- cluster (see Figure 2 in Section 3.1.))

# Supplementary Materials Figure S4

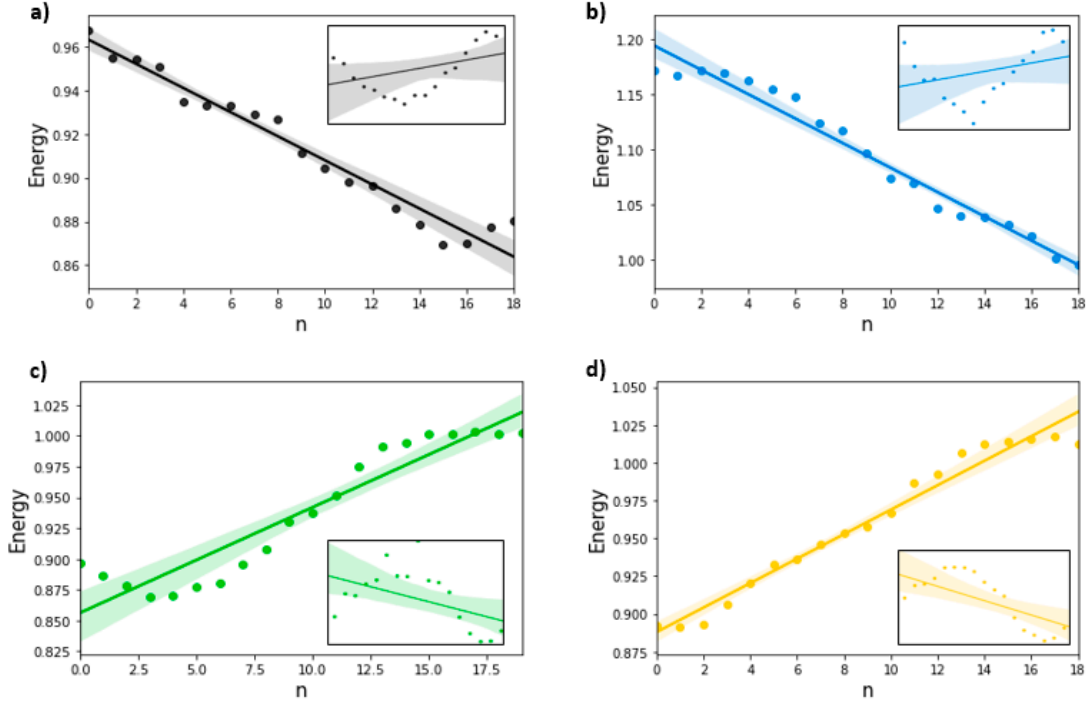

**Figure S4.** Energy plots representing cases in which the sign of the variations of the features chosen in our clustering analysis ( $\Delta E$  and  $\Delta HR$ , according to equation 7) and the sign of the slope calculated with the linear analysis are in agreement. The colors of the plots are equal to the color used to indicate the respective clusters (black for  $-/-$  cluster, blue for  $-/+$  cluster, green for  $+/-$  cluster and yellow for  $+/+$  cluster (see Figure 2 in Section 3.1.). In the inserts are instead reported energy plots representing representative cases in which the value of the variations of the features chosen in our clustering analysis and the value of the slope calculated with the linear analysis disagree. For example, in the inset plots in Figure S4a,b the energy variation ( $\Delta E$ ) should be negative. Linear regression, on the other hand, identifies a positive slope. Similarly in Figure S4c,d  $\Delta E$  should be negative but the slopes are positive. This happens when there are particular configurations in which the variation is very close to zero. In these cases the slope becomes sensitive to noise. Instead in our features the value of  $v_0$  is close to zero and therefore the skewness  $v_1$  becomes important. Therefore in these cases the sign of the variation takes into account the general tendency of the data to be above or below the average value.

### Supplementary Materials Table S1

**Table S1.** Values of repeated measures ANOVA and Tukey HSD post hoc for both RQA and Clustering analysis performed on the three temporal sections. *p*-value annotation legend: ns:  $5.00 \times 10^{-2} < p \leq 1.00 \times 10^0$ ; \*:  $1.00 \times 10^{-2} < p \leq 5.00 \times 10^{-2}$ ; \*\*:  $1.00 \times 10^{-3} < p \leq 1.00 \times 10^{-2}$ ; \*\*\*:  $1.00 \times 10^{-4} < p \leq 1.00 \times 10^{-3}$ ; \*\*\*\*:  $p \leq 1.00 \times 10^{-4}$ .

| Analysis   | Features | section1<br>N=21 | section2<br>N=21 | section3<br>N=21 | P-value            | Post-hoc pairwise comparison (padj) |                  |               |
|------------|----------|------------------|------------------|------------------|--------------------|-------------------------------------|------------------|---------------|
|            |          | Mean±sd          | Mean±sd          | Mean±sd          | p                  | Start-middle                        | Start-end        | Middle-end    |
| RQA        | DET      | 0.86±0.06        | 0.90±0.05        | 0.92±0.02        | p<0.0001<br>(****) | 0.0234<br>(*)                       | p<0.001<br>(***) | 0.2791        |
| Clustering | %- -     | 0.28±0.07        | 0.22±0.06        | 0.24±0.07        | 0.0198<br>(*)      | 0.0143<br>(*)                       | 0.0996           | 0.6869        |
|            | %-+      | 0.33±0.06        | 0.27±0.06        | 0.22±0.07        | p<0.0001<br>(****) | 0.0079<br>(**)                      | p<0.001<br>(***) | 0.0447<br>(*) |
|            | %+-      | 0.15±0.06        | 0.22±0.08        | 0.21±0.07        | 0.0032<br>(**)     | 0.0032<br>(**)                      | 0.011<br>(*)     | 0.9           |
|            | %++      | 0.23±0.07        | 0.28±0.07        | 0.33±0.06        | p<0.001<br>(***)   | 0.038<br>(*)                        | p<0.001<br>(**)  | 0.1163        |
